# Supplementary material for: Synthesis and anti-hepatocellular carcinoma evaluation of salicylic acid-modified indole trimethoxy flavonoid derivatives
Source: Royal Society of Chemistry journal article supplement (doi:10.1039/d3md00128h), 2023-01-01
Supplement: d3md00128h1.pdf [file d3md00128h1.pdf]

## Supporting Information

### Synthesis and anti-hepatocellular carcinoma evaluation of salicylic acid- modified indole trimethoxy flavonoid derivatives

Yang Zou<sup>a,b</sup>, Na Lu<sup>c</sup>, Xiaoyan Yang<sup>b</sup>, Zhizhong Xie<sup>b</sup>, Xiaoyong Lei<sup>b</sup>, Xingyun Liu<sup>d</sup>, Yong Li<sup>d</sup>,  
Sheng Huang<sup>e</sup>, Guotao Tang<sup>b,\*</sup>, Zhe Wang<sup>a,\*</sup>

<sup>a</sup>The Second Affiliated Hospital, Department of Pharmacy, Hengyang Medical School, University of South China, Hengyang 421001, Hunan, China.

<sup>b</sup>Institute of Pharmacy and Pharmacology, Hunan Provincial Key Laboratory of Tumor Microenvironment Responsive Drug Research, Hengyang Medical School, Hengyang, Hunan, 421001, China.

<sup>c</sup>School of Nursing, Hengyang Medicinal School, University of South China, Hengyang, Hunan, 421001, China.

<sup>d</sup>The Affiliated Nanhua Hospital, Hengyang Medical School, University of South China, Hengyang, Hunan, 421001, China.

<sup>e</sup>Jiuzhitang Co., Ltd, Changsha, Hunan, 410007, China.

\*Corresponding authors: Email: wangz1525@163.com (Z Wang), tgzq@163.com (G Tang).

## Table of Contents

|                        |                                                                                                                           |    |
|------------------------|---------------------------------------------------------------------------------------------------------------------------|----|
| <b>Figure S1-S15</b>   | <sup>1</sup> H-NMR spectrums of compounds <b>6</b> , <b>7</b> , <b>8a-8g</b> and <b>9a-9f</b> .....                       | 3  |
| <b>Figure S16-S27.</b> | <sup>13</sup> C-NMR spectrums of compounds <b>6</b> , <b>7</b> , <b>8a-8g</b> and <b>9c</b> , <b>9e</b> , <b>9f</b> ..... | 10 |
| <b>Figure S28-S42.</b> | HRMS spectrums of compounds <b>6</b> , <b>7</b> , <b>8a-8g</b> and <b>9a-9f</b> .....                                     | 16 |

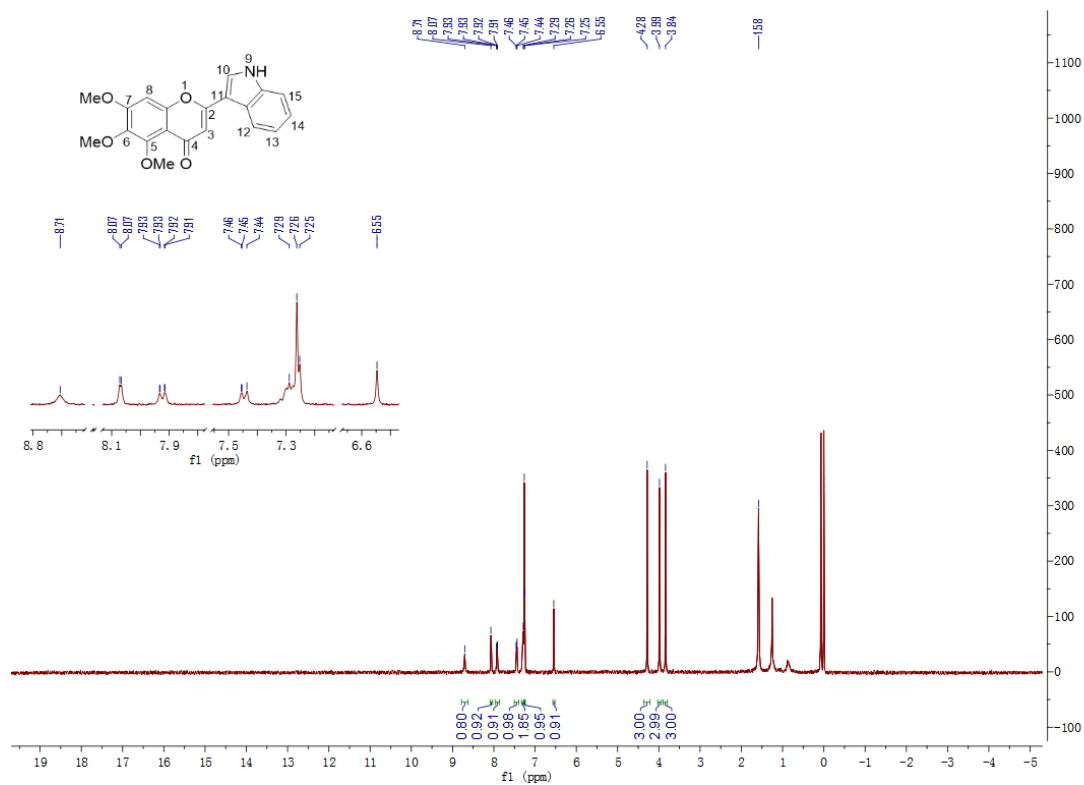

**Figure S1.** <sup>1</sup>H-NMR (400 MHz) spectrum of compound **6** in CDCl<sub>3</sub>.

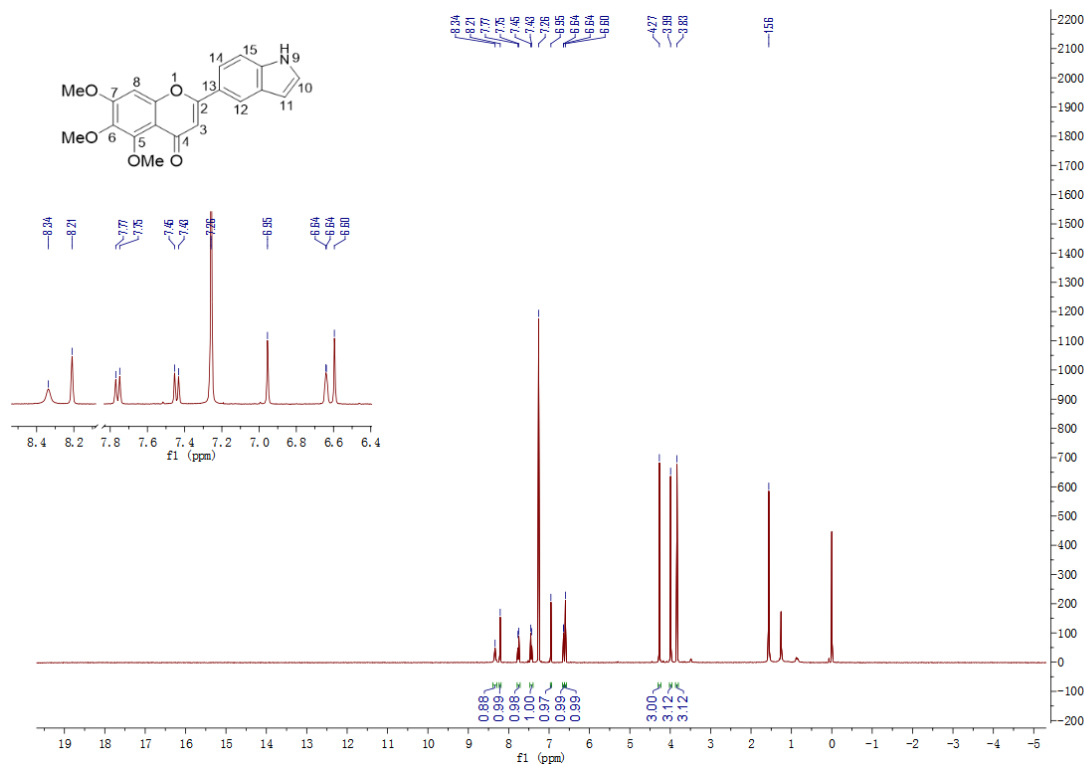

**Figure S2.** <sup>1</sup>H-NMR (400 MHz) spectrum of compound **7** in CDCl<sub>3</sub>.

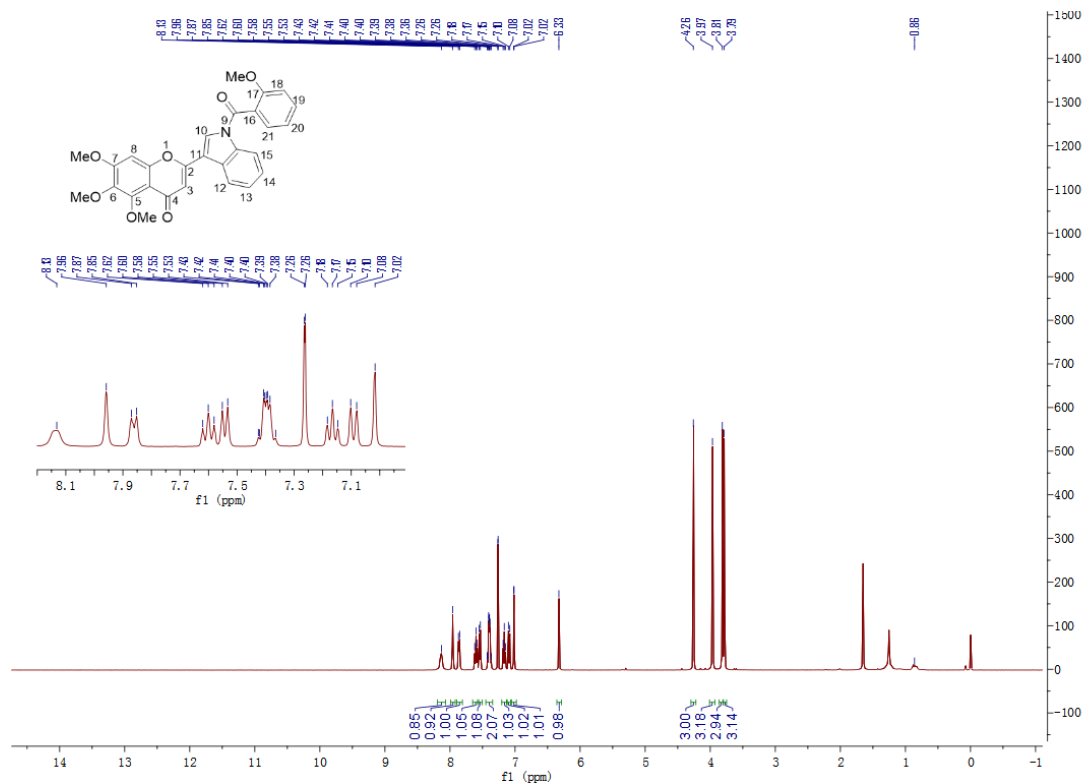

**Figure S3.**  $^1\text{H-NMR}$  (400 MHz) spectrum of compound **8a** in  $\text{CDCl}_3$ .

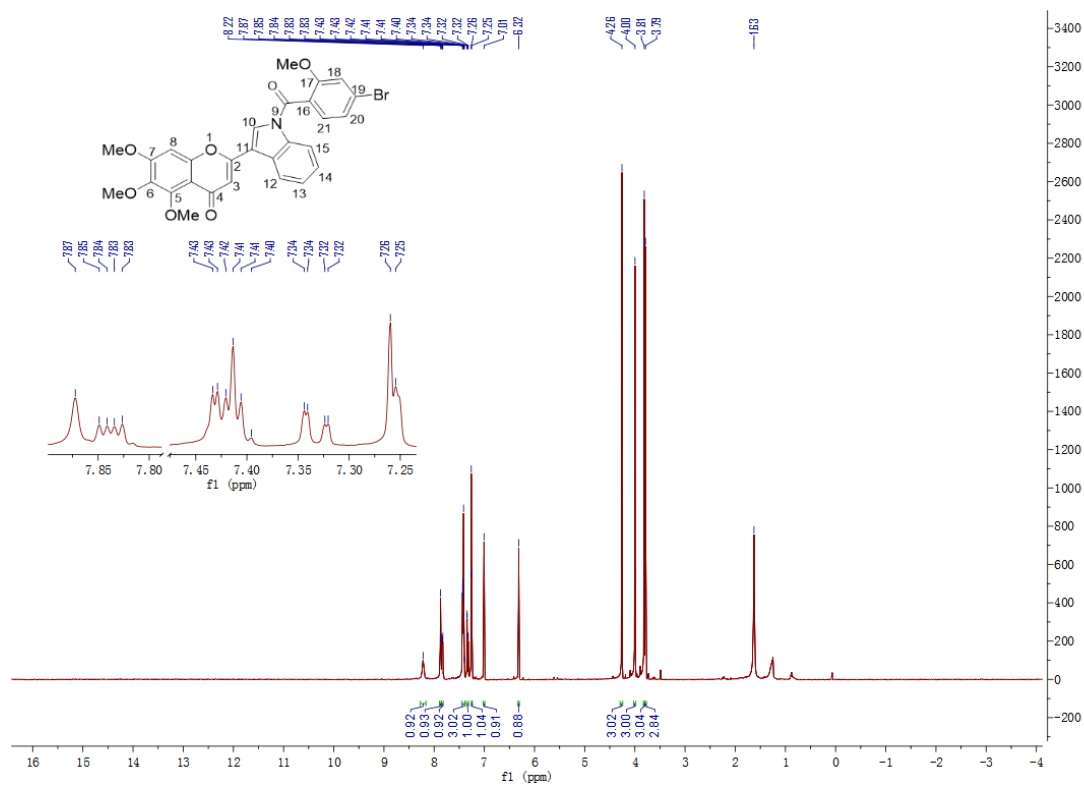

**Figure S4.**  $^1\text{H-NMR}$  (400 MHz) spectrum of compound **8b** in  $\text{CDCl}_3$ .

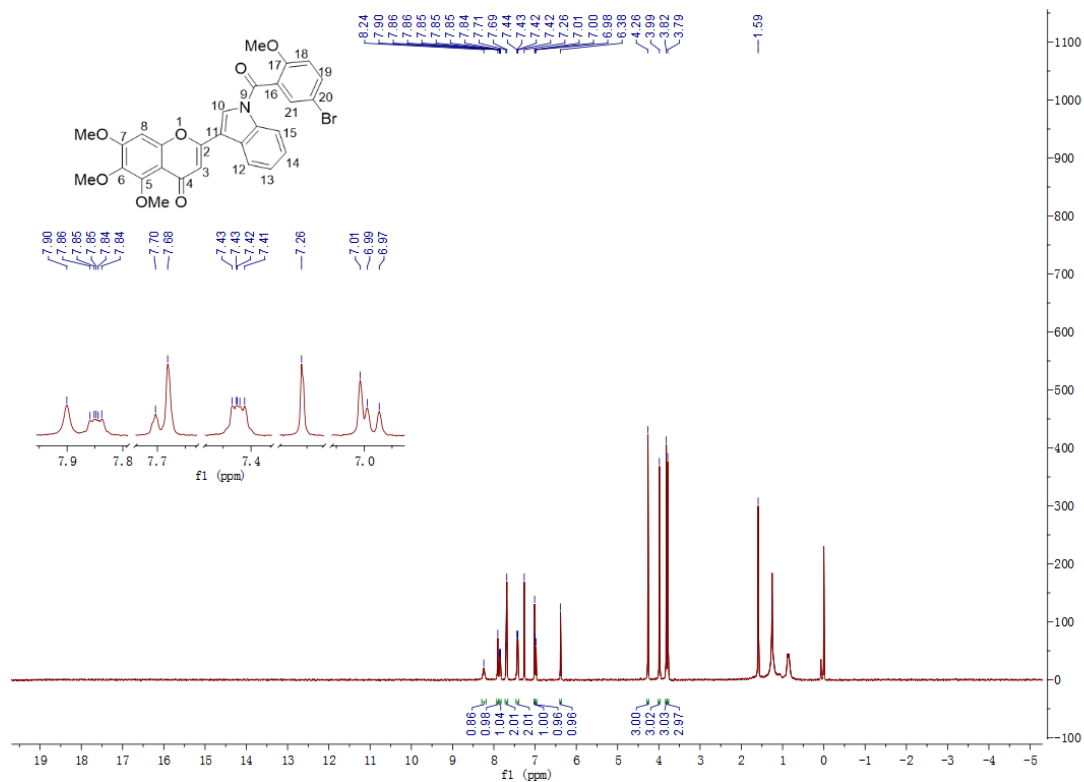

**Figure S5.** <sup>1</sup>H-NMR (400 MHz) spectrum of compound **8c** in CDCl<sub>3</sub>.

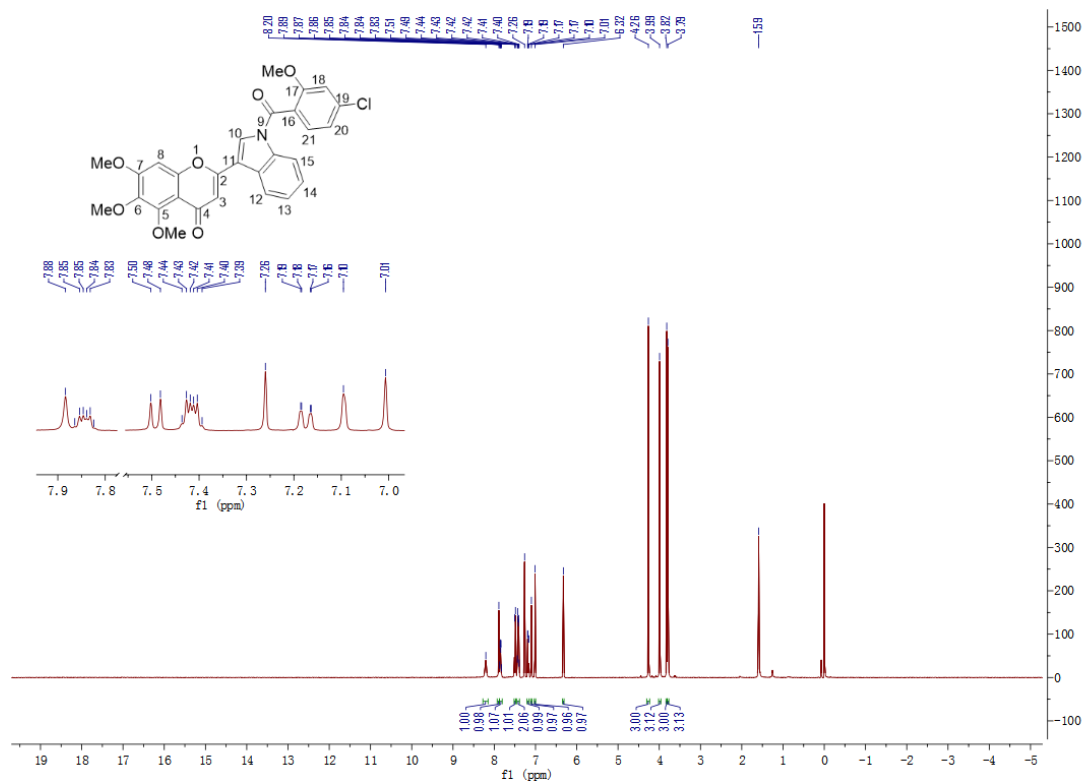

**Figure S6.** <sup>1</sup>H-NMR (400 MHz) spectrum of compound **8d** in CDCl<sub>3</sub>.

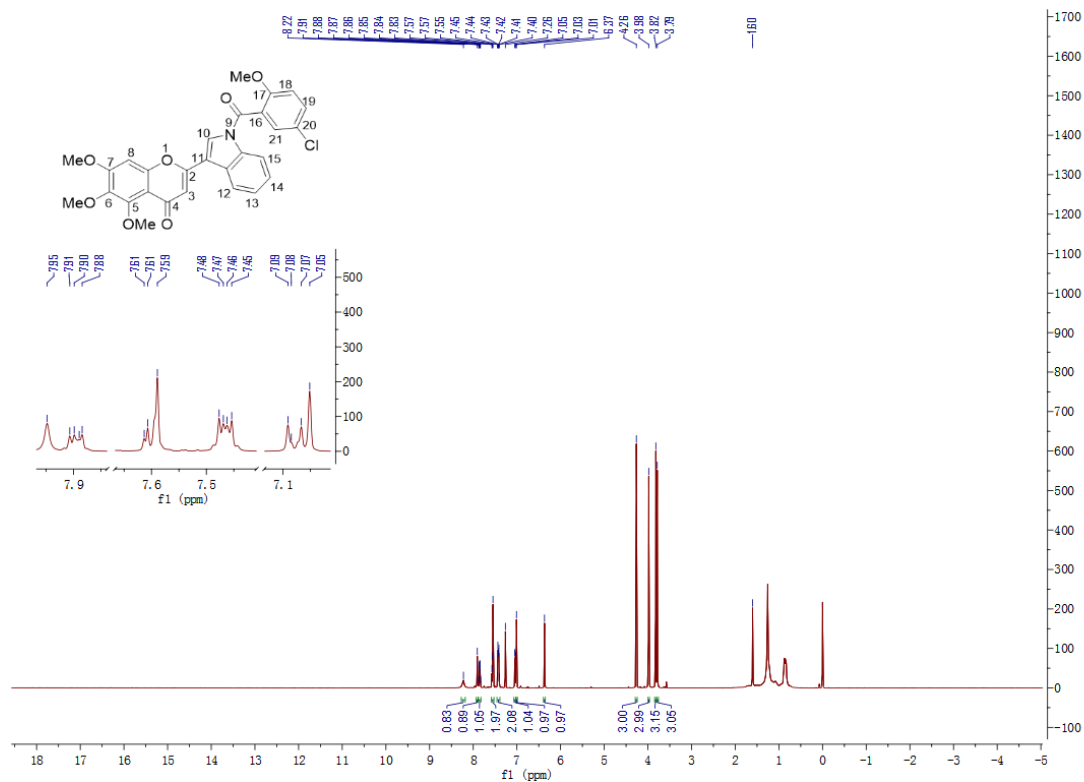

**Figure S7.**  $^1\text{H-NMR}$  (400 MHz) spectrum of compound **8e** in  $\text{CDCl}_3$ .

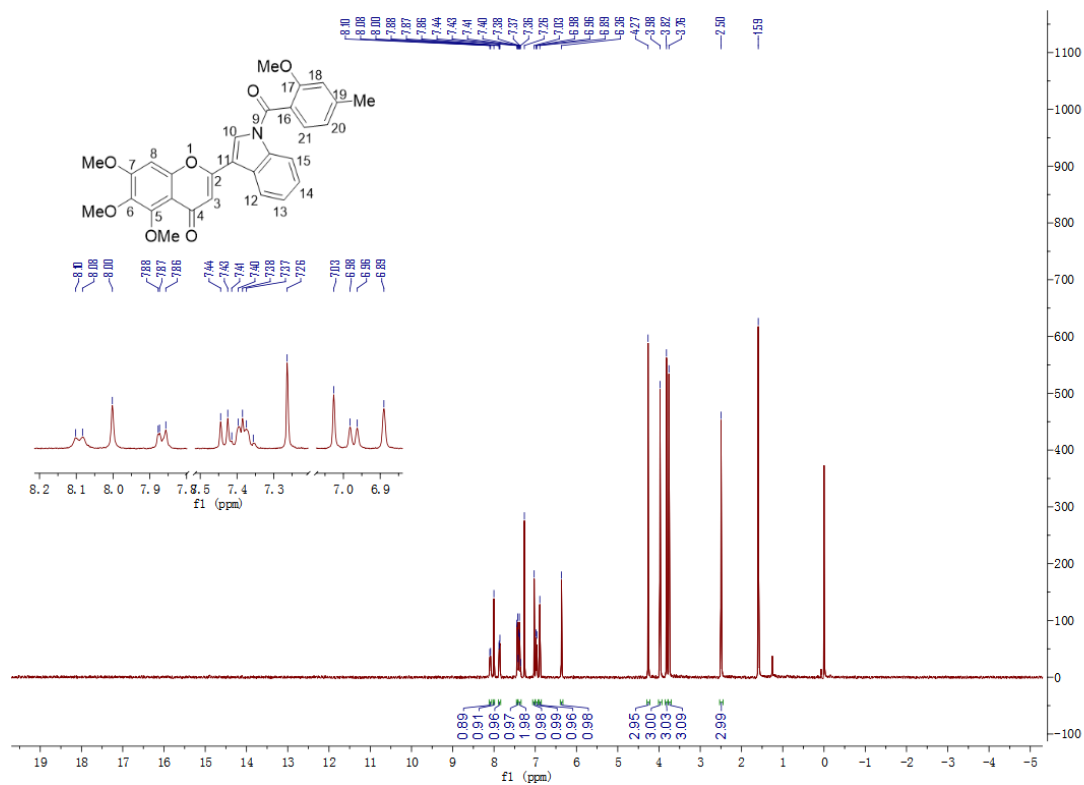

**Figure S8.**  $^1\text{H-NMR}$  (400 MHz) spectrum of compound **8f** in  $\text{CDCl}_3$ .

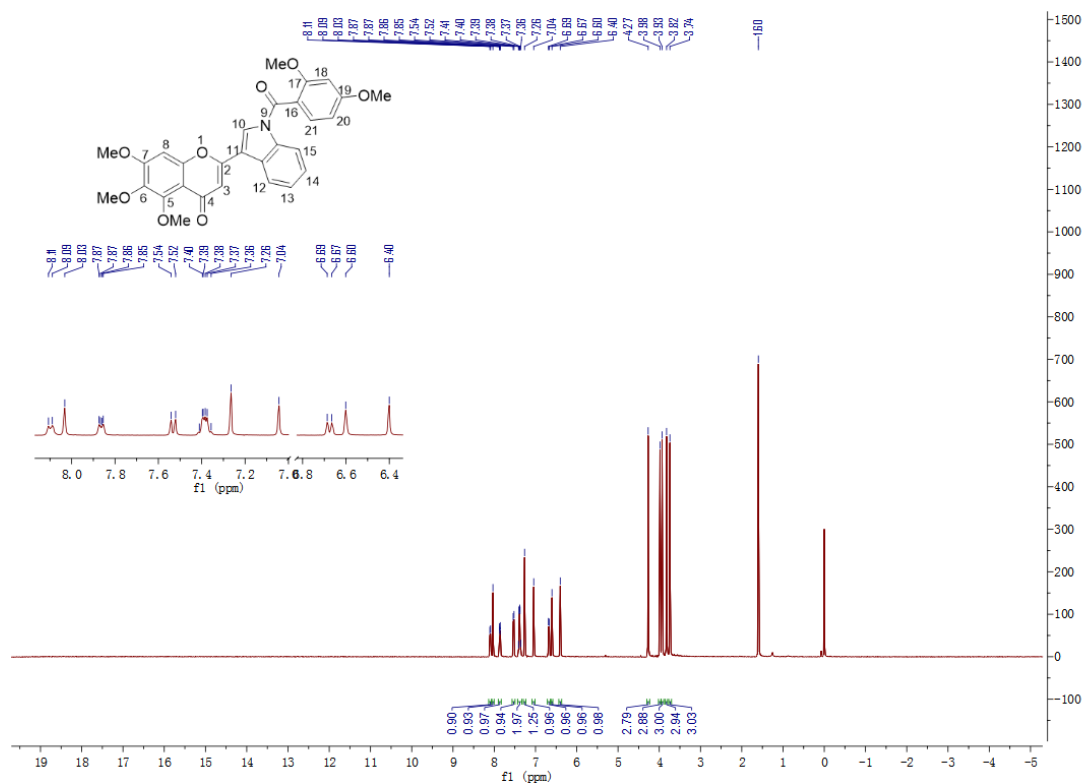

**Figure S9.**  $^1\text{H-NMR}$  (400 MHz) spectrum of compound **8g** in  $\text{CDCl}_3$ .

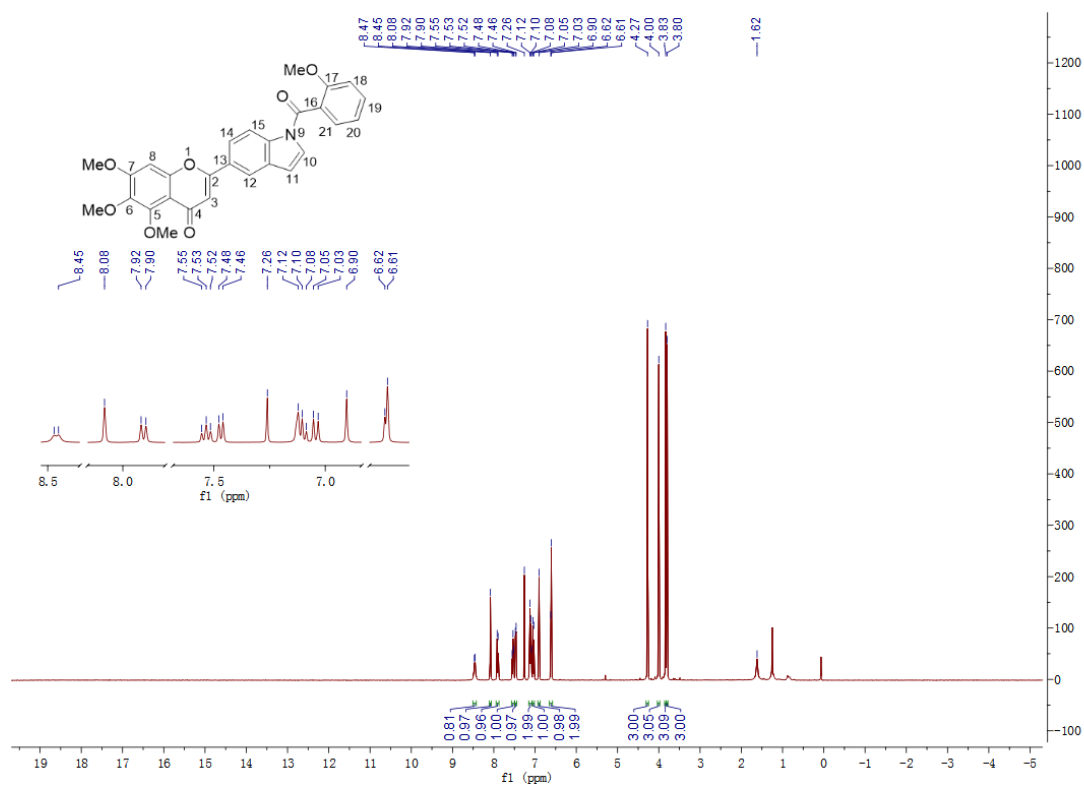

**Figure S10.**  $^1\text{H-NMR}$  (400 MHz) spectrum of compound **9a** in  $\text{CDCl}_3$ .

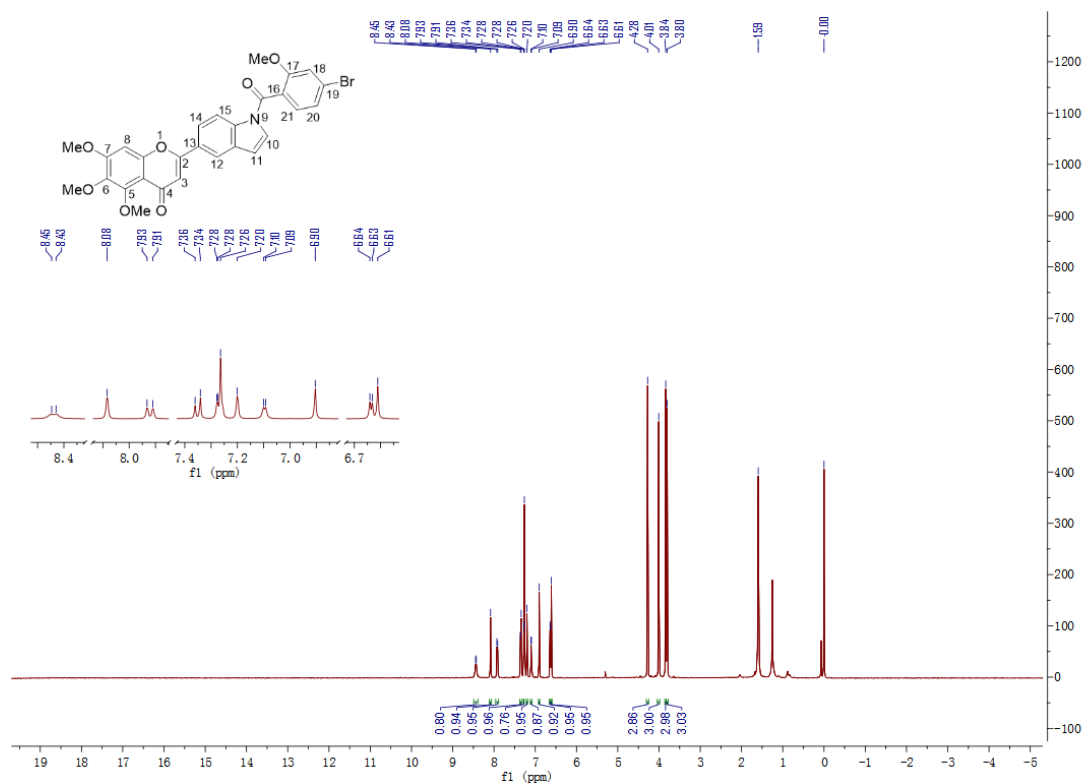

Figure S11. <sup>1</sup>H-NMR (400 MHz) spectrum of compound **9b** in CDCl<sub>3</sub>.

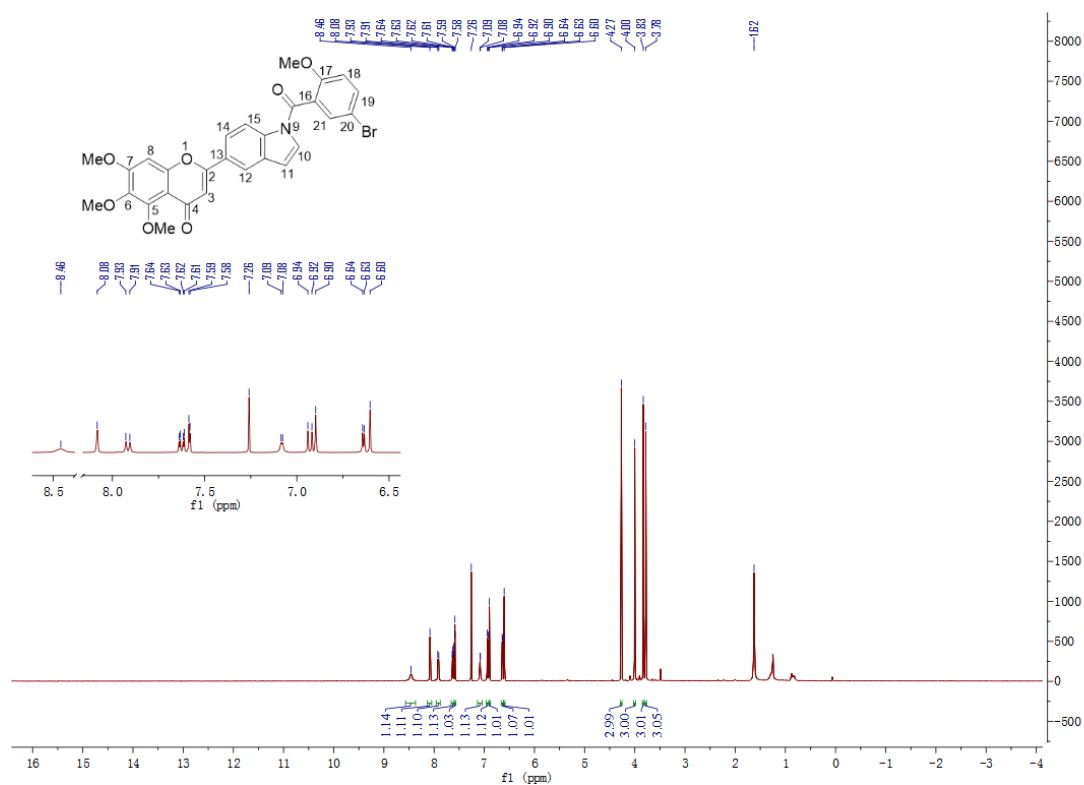

Figure S12. <sup>1</sup>H-NMR (400 MHz) spectrum of compound **9c** in CDCl<sub>3</sub>.



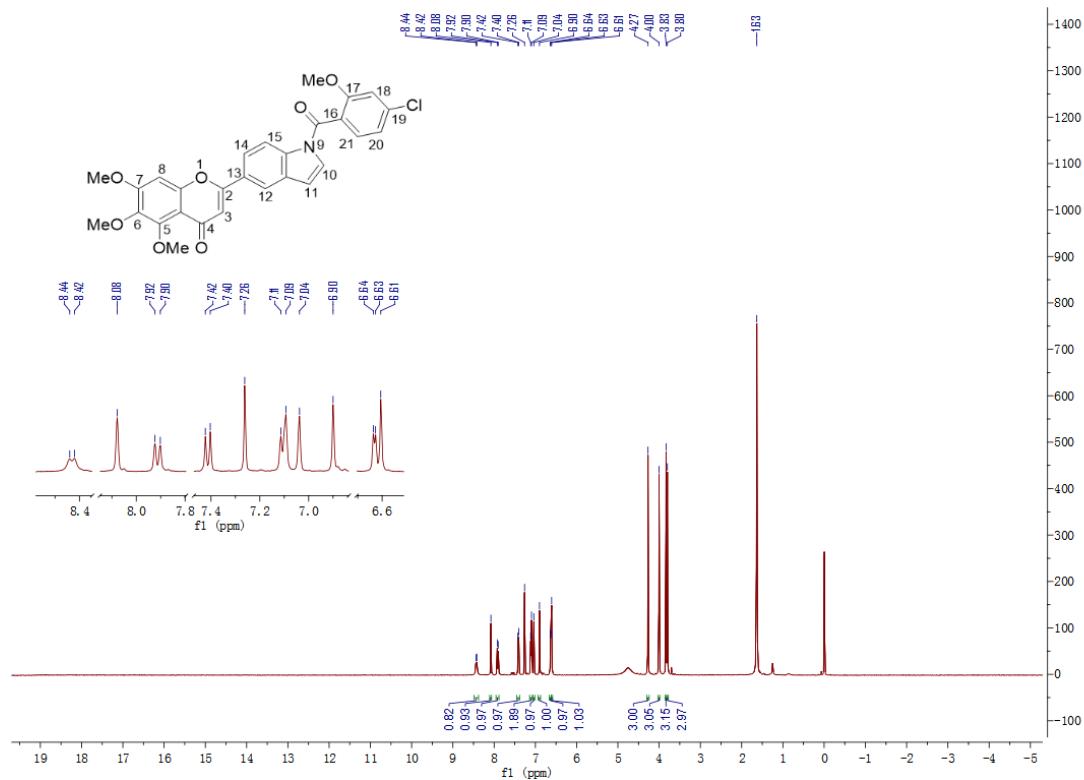

**Figure S13.**  $^1\text{H-NMR}$  (400 MHz) spectrum of compound **9d** in  $\text{CDCl}_3$ .

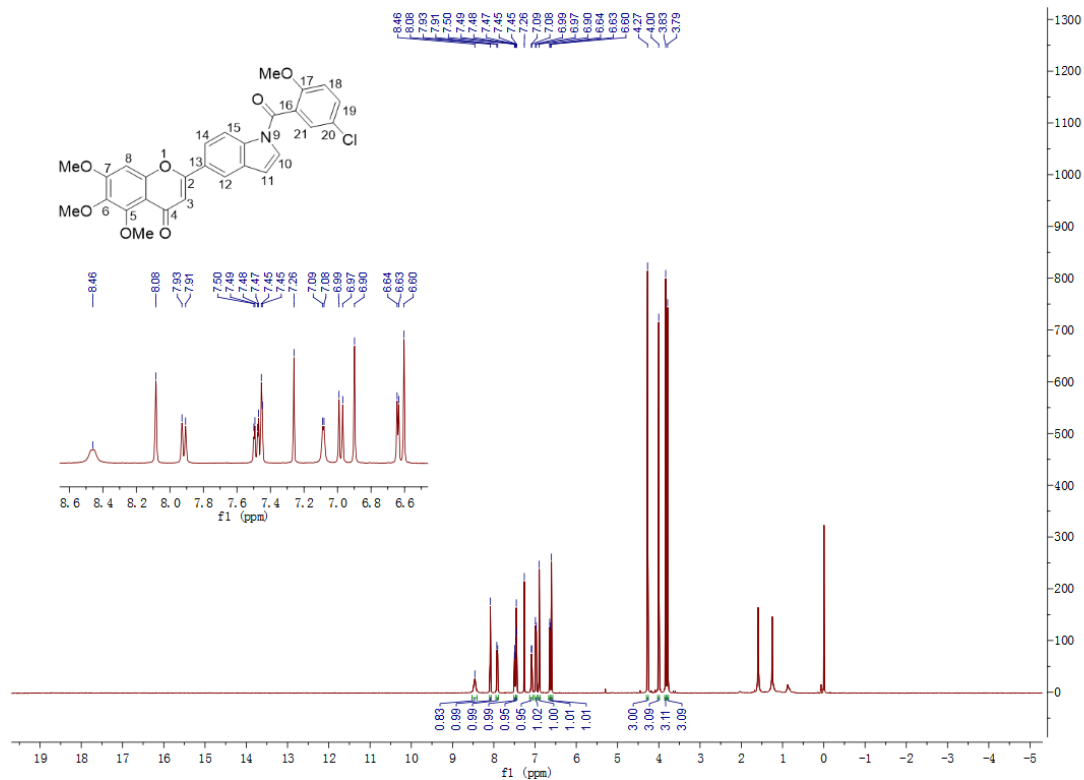

**Figure S14.**  $^1\text{H-NMR}$  (400 MHz) spectrum of compound **9e** in  $\text{CDCl}_3$ .

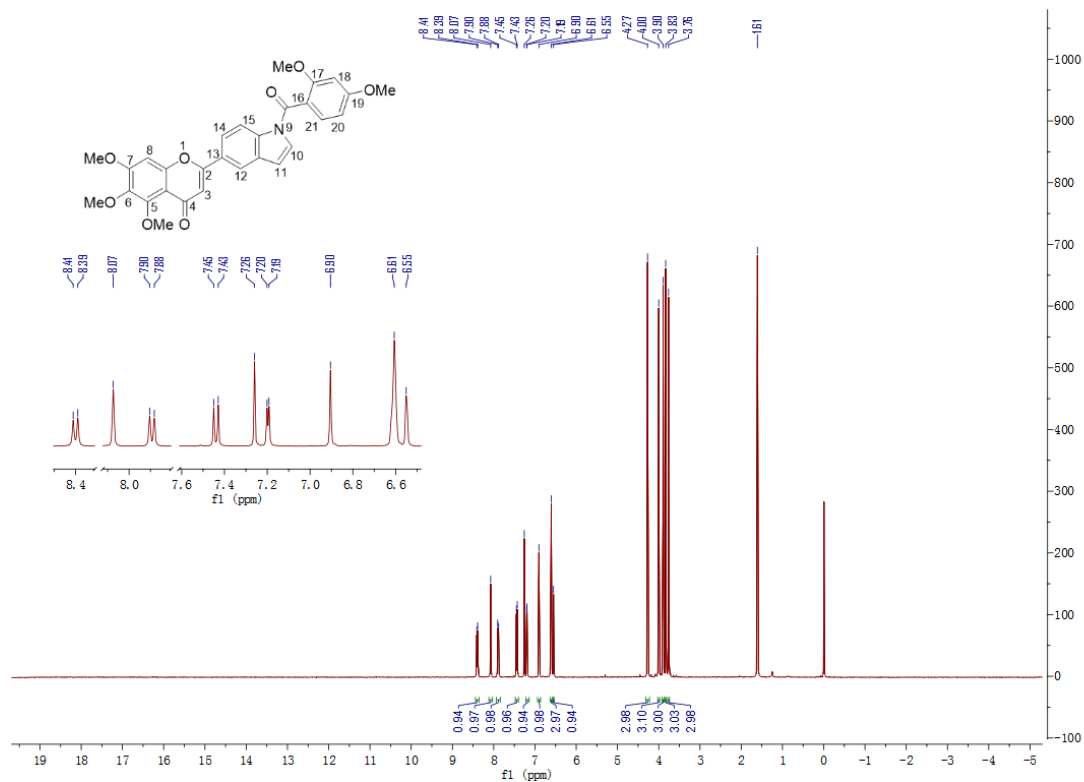

**Figure S15.**  $^1\text{H-NMR}$  (400 MHz) spectrum of compound **9f** in  $\text{CDCl}_3$ .

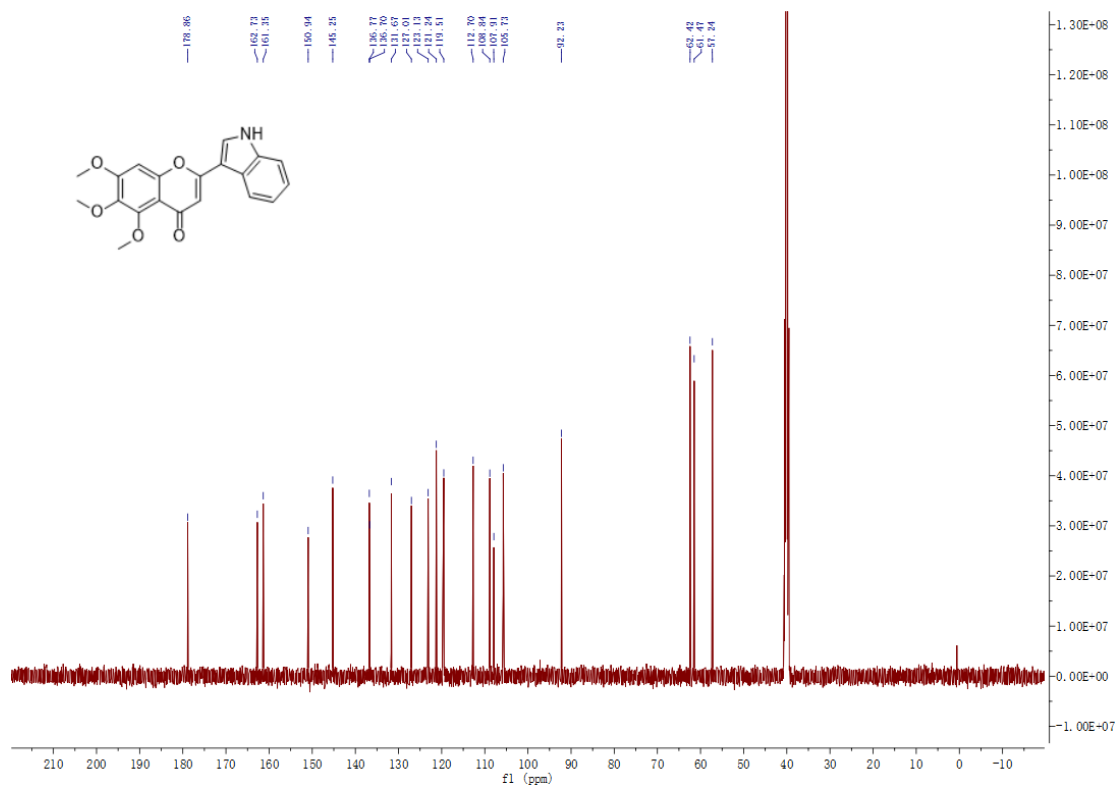

**Figure S16.**  $^{13}\text{C-NMR}$  (125 MHz) spectrum of compound **6** in  $\text{DMSO-}d_6$ .

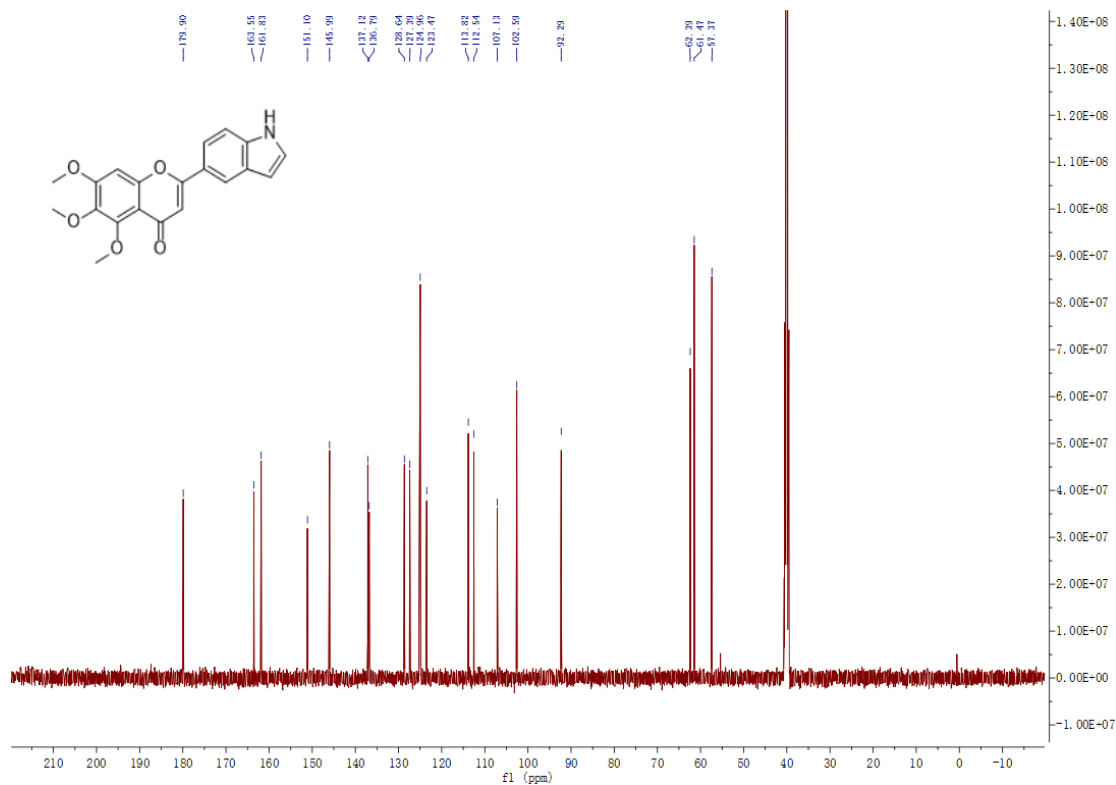

Figure S17.  $^{13}\text{C}$ -NMR (125 MHz) spectrum of compound **7** in  $\text{DMSO-}d_6$ .

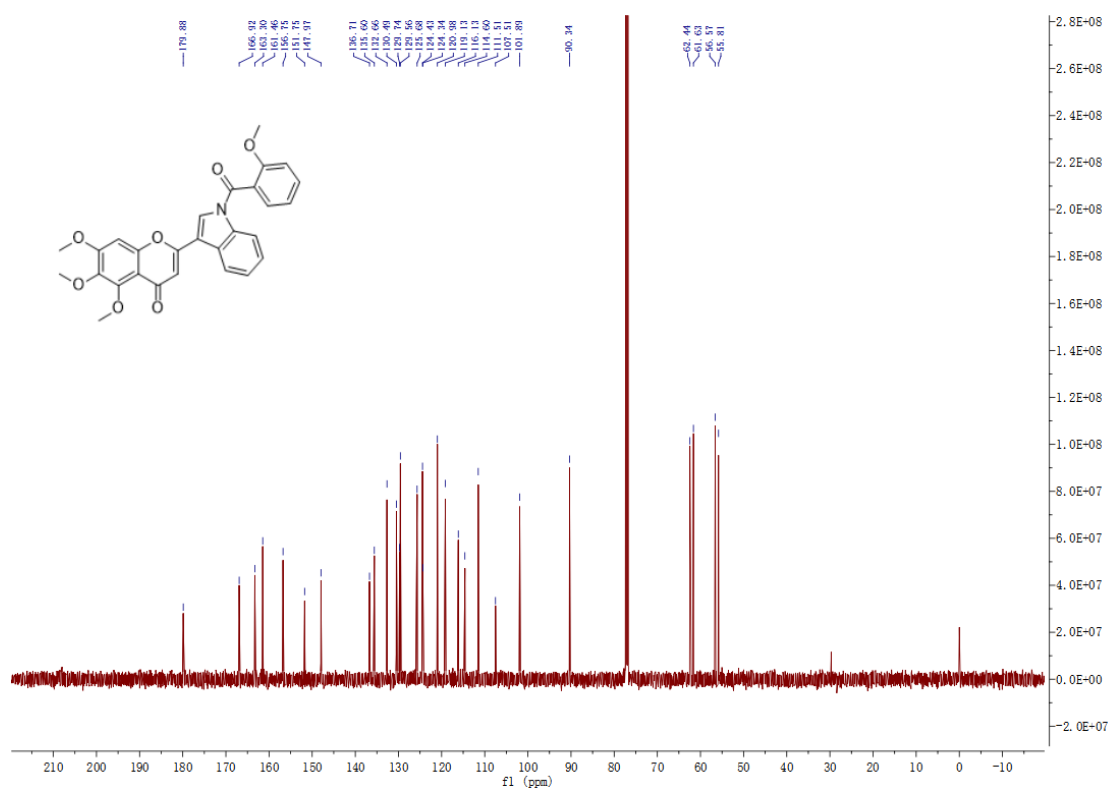

Figure S18.  $^{13}\text{C}$ -NMR (125 MHz) spectrum of compound **8a** in  $\text{CDCl}_3$ .

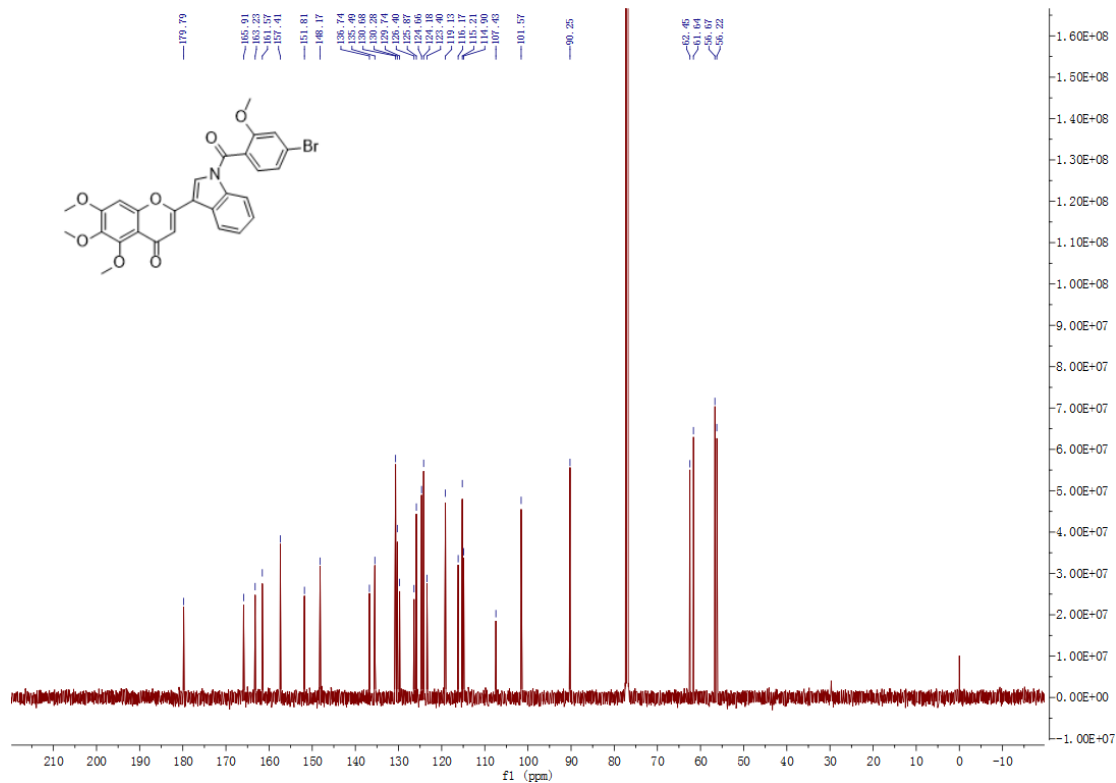

Figure S19.  $^{13}\text{C}$ -NMR (125 MHz) spectrum of compound **8b** in  $\text{CDCl}_3$ .

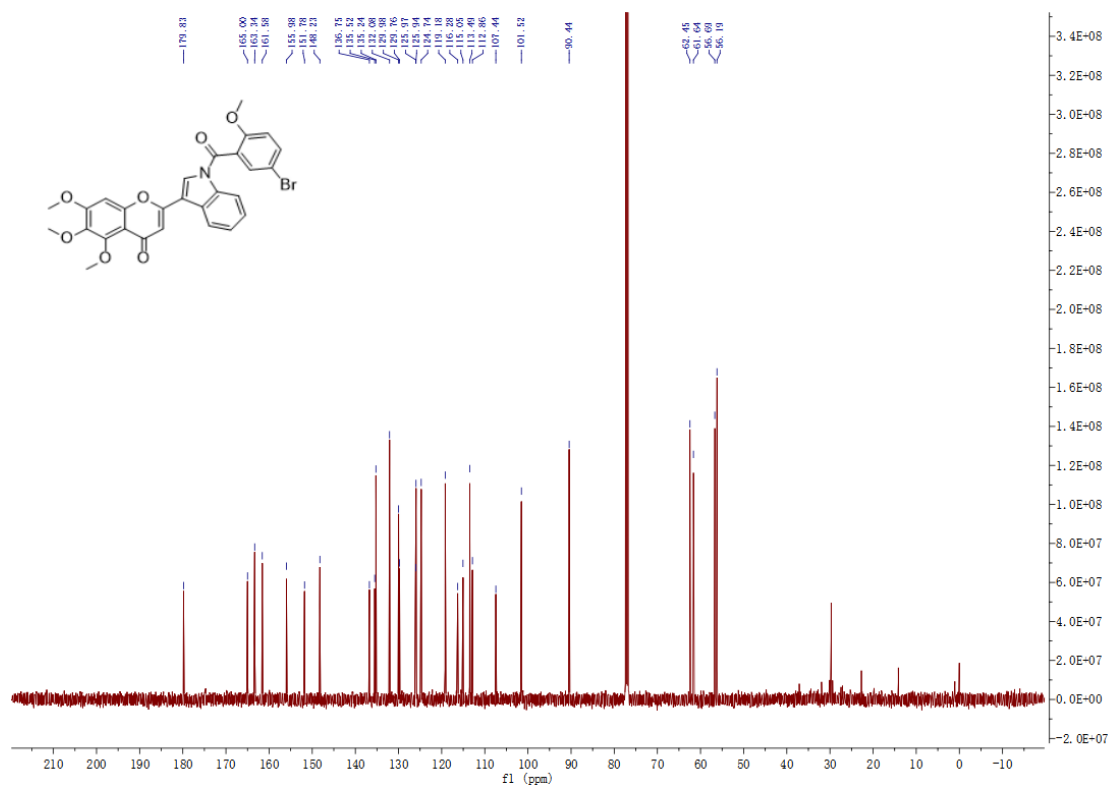

Figure S20.  $^{13}\text{C}$ -NMR (125 MHz) spectrum of compound **8c** in  $\text{CDCl}_3$ .

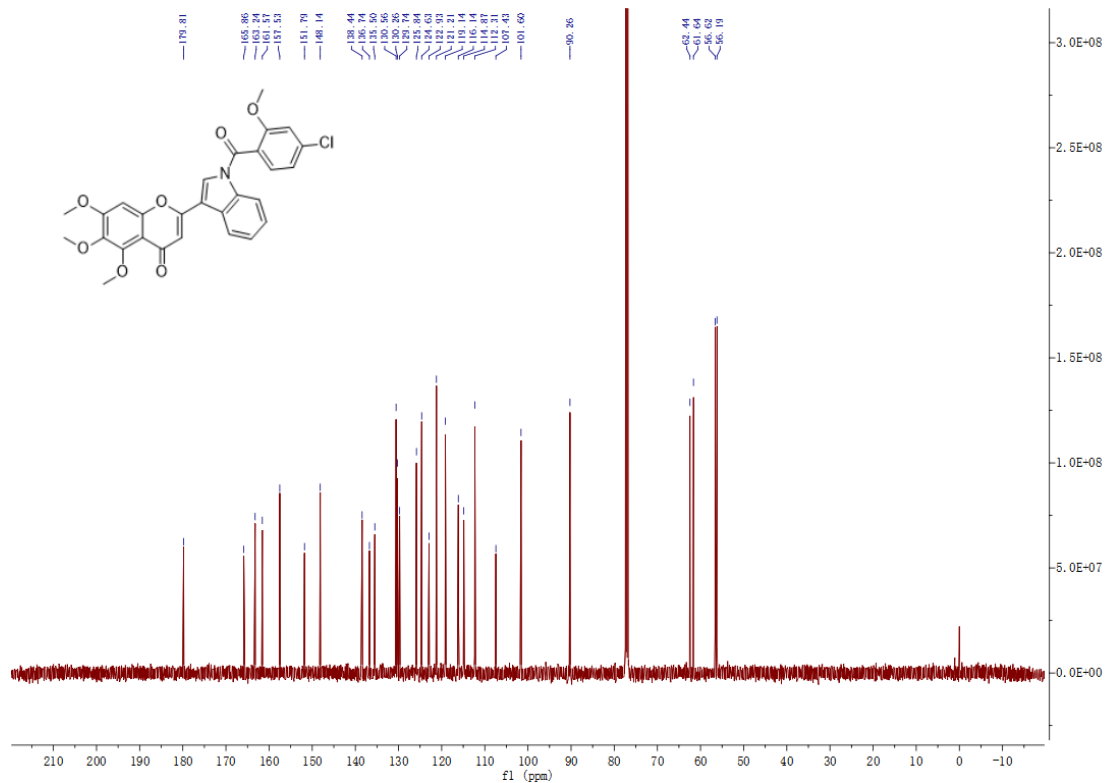

**Figure S21.**  $^{13}\text{C-NMR}$  (125 MHz) spectrum of compound **8d** in  $\text{CDCl}_3$ .

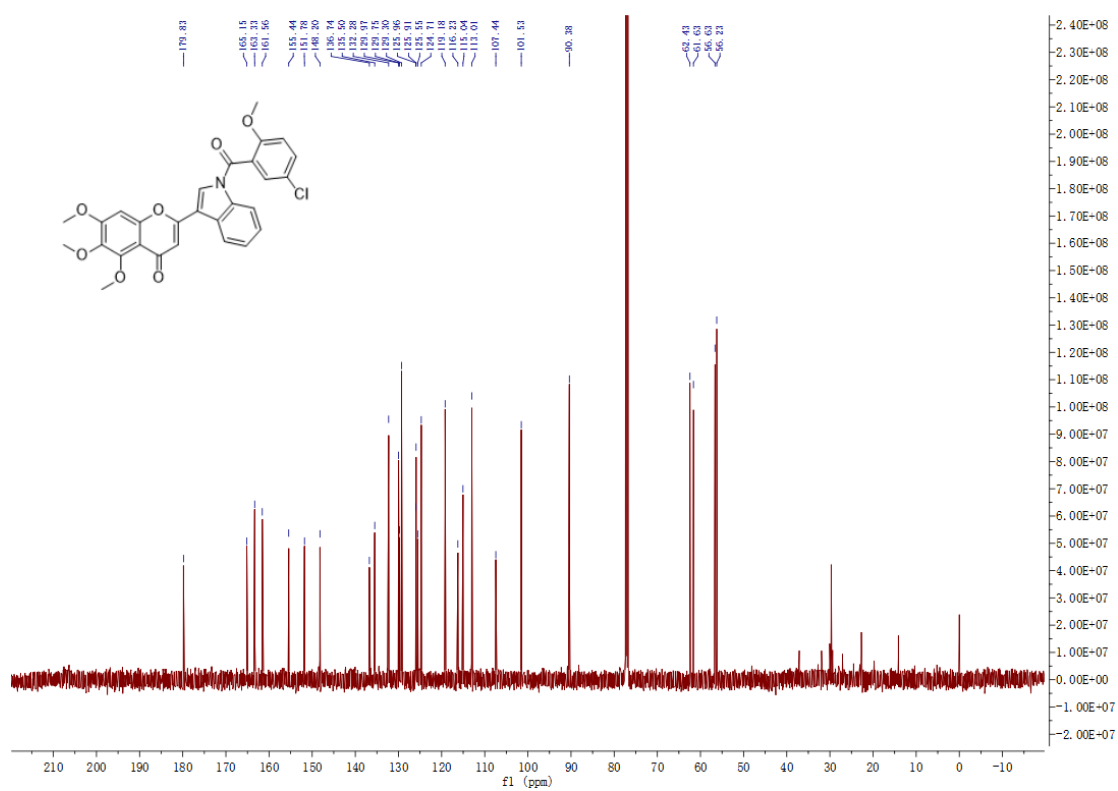

**Figure S22.**  $^{13}\text{C-NMR}$  (125 MHz) spectrum of compound **8e** in  $\text{CDCl}_3$ .

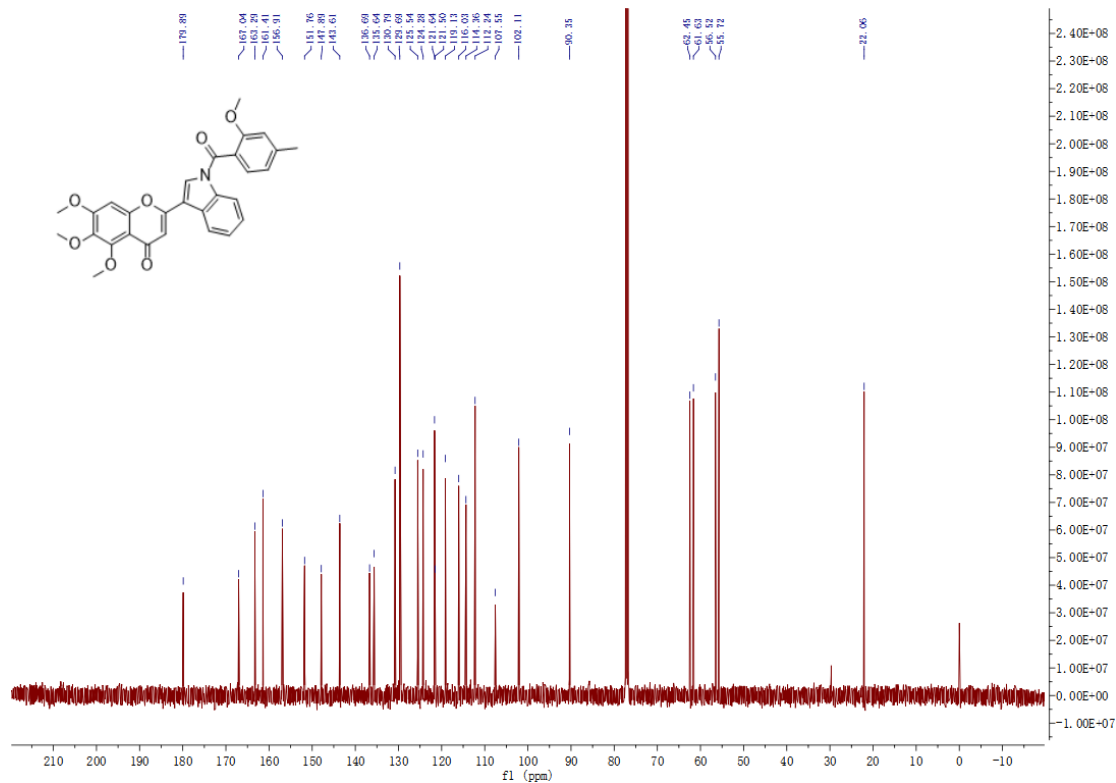

**Figure S23.**  $^{13}\text{C}$ -NMR (125 MHz) spectrum of compound **8f** in  $\text{CDCl}_3$ .

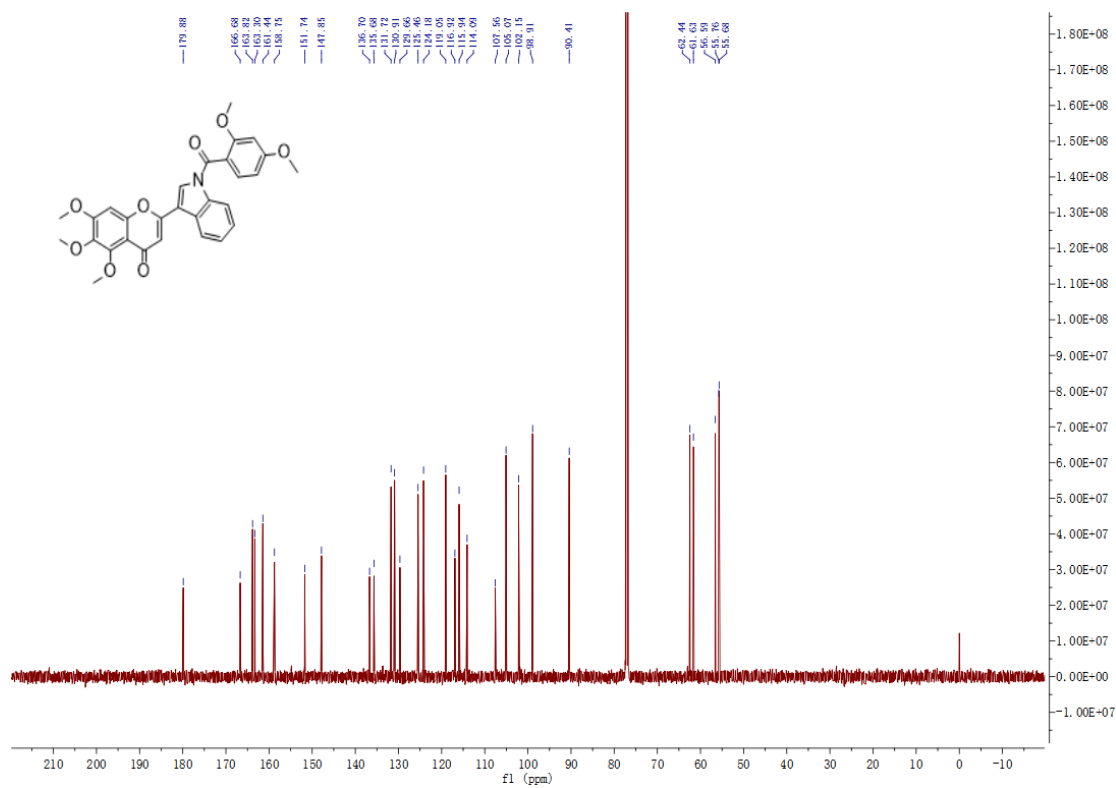

**Figure S24.**  $^{13}\text{C}$ -NMR (125 MHz) spectrum of compound **8g** in  $\text{CDCl}_3$ .

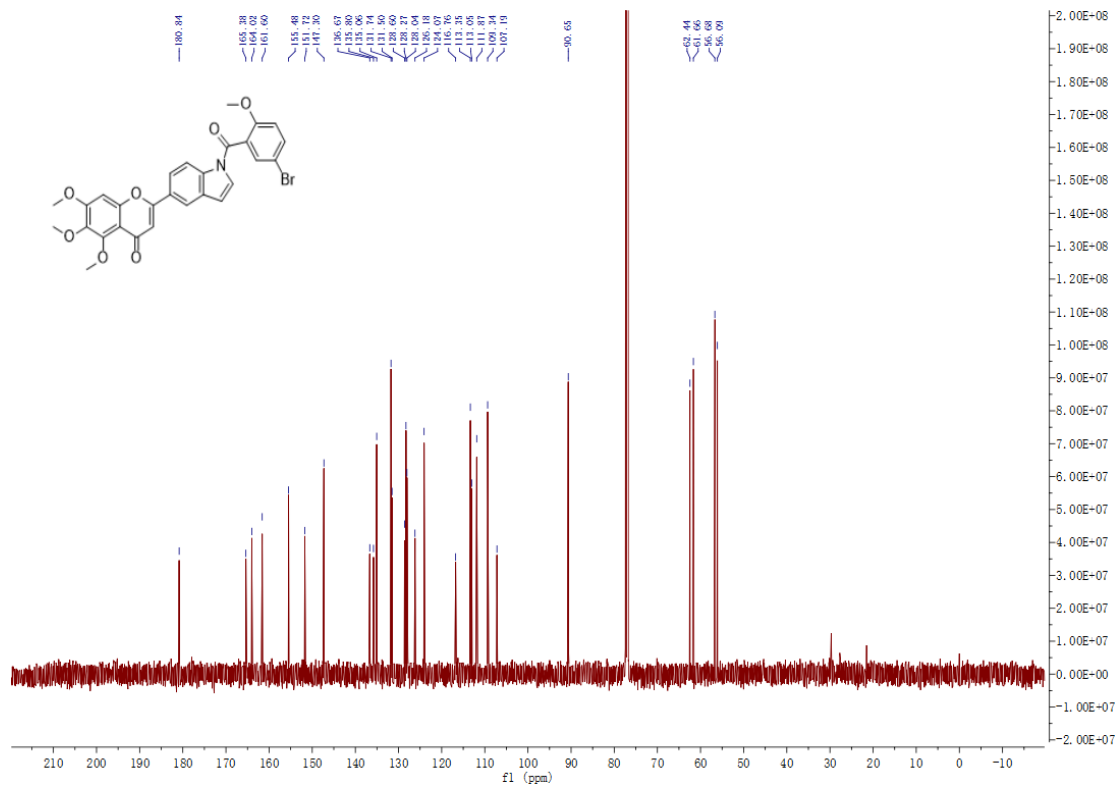

Figure S25.  $^{13}\text{C}$ -NMR (125 MHz) spectrum of compound 9c in  $\text{CDCl}_3$ .

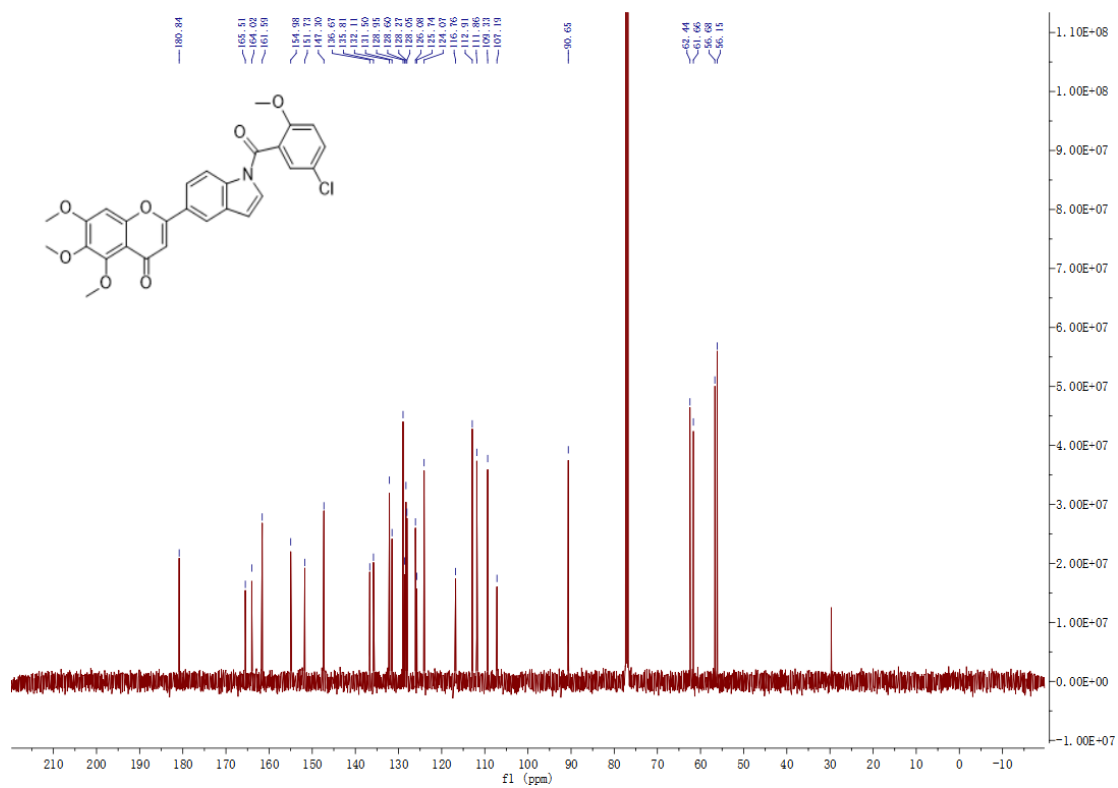

Figure S26.  $^{13}\text{C}$ -NMR (125 MHz) spectrum of compound 9e in  $\text{CDCl}_3$ .

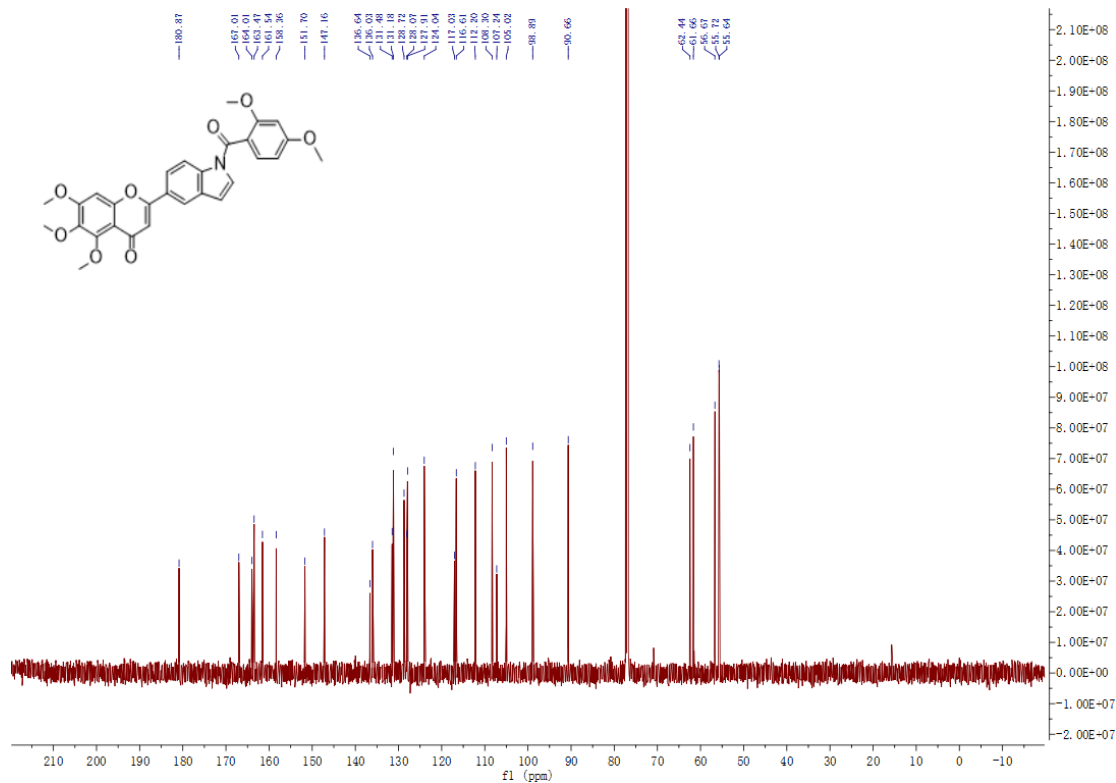

Figure S27.  $^{13}\text{C}$ -NMR (125 MHz) spectrum of compound **9f** in  $\text{CDCl}_3$ .

### Elemental Composition Report

Page 1

#### Single Mass Analysis

Tolerance = 3.0 PPM / DBE: min = -1.5, max = 50.0

Element prediction: Off

Number of isotope peaks used for i-FIT = 3

Monoisotopic Mass, Even Electron Ions

554 formula(e) evaluated with 1 results within limits (up to 50 best isotopic matches for each mass)

Elements Used:

C: 20-20 H: 18-18 N: 0-5 O: 0-200 S: 0-6

2

0312-2-1a 206 (1.153)

1: TOF MS ES+  
7.38e+006

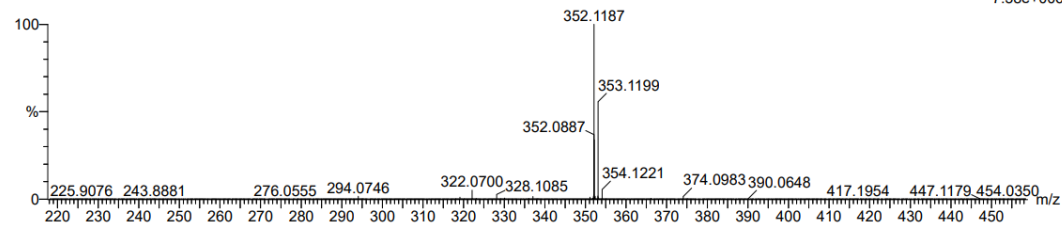

Minimum: -1.5  
Maximum: 5.0 3.0 50.0

| Mass     | Calc. Mass | mDa | PPM | DBE  | i-FIT  | Norm | Conf (%) | Formula                                          |
|----------|------------|-----|-----|------|--------|------|----------|--------------------------------------------------|
| 352.1187 | 352.1185   | 0.2 | 0.6 | 12.5 | 1309.4 | n/a  | n/a      | C <sub>20</sub> H <sub>18</sub> N O <sub>5</sub> |

Figure S28. HRMS spectrum of compound **6**.



## Elemental Composition Report

Page 1

### Single Mass Analysis

Tolerance = 3.0 PPM / DBE: min = -1.5, max = 50.0

Element prediction: Off

Number of isotope peaks used for i-FIT = 3

Monoisotopic Mass, Even Electron Ions

99 formula(e) evaluated with 1 results within limits (up to 50 best isotopic matches for each mass)

Elements Used:

C: 20-20 H: 18-18 N: 0-5 O: 0-200

2

0312-2-2a 190 (1.069)

1: TOF MS ES+  
9.65e+006

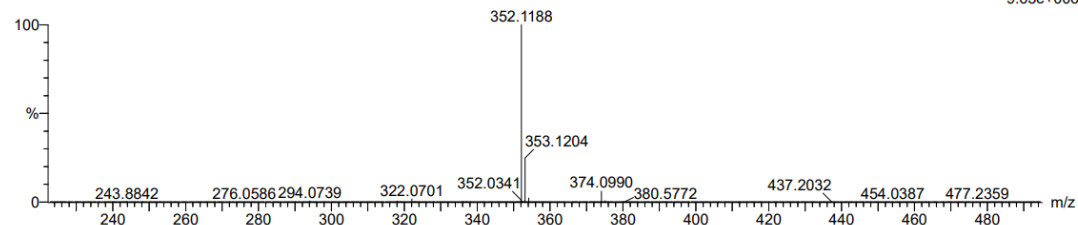

Minimum: -1.5  
Maximum: 5.0 3.0 50.0

| Mass     | Calc. Mass | mDa | PPM | DBE  | i-FIT  | Norm | Conf (%) | Formula      |
|----------|------------|-----|-----|------|--------|------|----------|--------------|
| 352.1188 | 352.1185   | 0.3 | 0.9 | 12.5 | 1192.8 | n/a  | n/a      | C20 H18 N 05 |

Figure S29. HRMS spectrum of compound 7.

## Elemental Composition Report

Page 1

### Single Mass Analysis

Tolerance = 3.0 PPM / DBE: min = -1.5, max = 50.0

Element prediction: Off

Number of isotope peaks used for i-FIT = 3

Monoisotopic Mass, Even Electron Ions

180 formula(e) evaluated with 1 results within limits (up to 50 best isotopic matches for each mass)

Elements Used:

C: 28-28 H: 24-24 N: 0-7 O: 0-200

2

0312-2-1b 234 (1.308)

1: TOF MS ES+  
6.67e+006

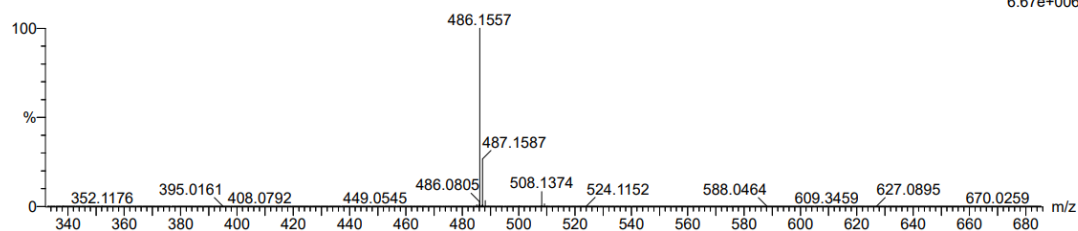

Minimum: -1.5  
Maximum: 5.0 3.0 50.0

| Mass     | Calc. Mass | mDa | PPM | DBE  | i-FIT  | Norm | Conf (%) | Formula      |
|----------|------------|-----|-----|------|--------|------|----------|--------------|
| 486.1557 | 486.1553   | 0.4 | 0.8 | 17.5 | 1069.4 | n/a  | n/a      | C28 H24 N 07 |

Figure S30. HRMS spectrum of compound 8a.

## Single Mass Analysis

Tolerance = 3.0 PPM / DBE: min = -1.5, max = 50.0

Element prediction: Off

Number of isotope peaks used for i-FIT = 3

Monoisotopic Mass, Even Electron Ions

896 formula(e) evaluated with 1 results within limits (up to 50 best isotopic matches for each mass)

Elements Used:

C: 28-28 H: 23-23 N: 0-7 O: 0-200 Br: 0-8

2

0312-2-1c 265 (1.478)

1: TOF MS ES+  
3.47e+006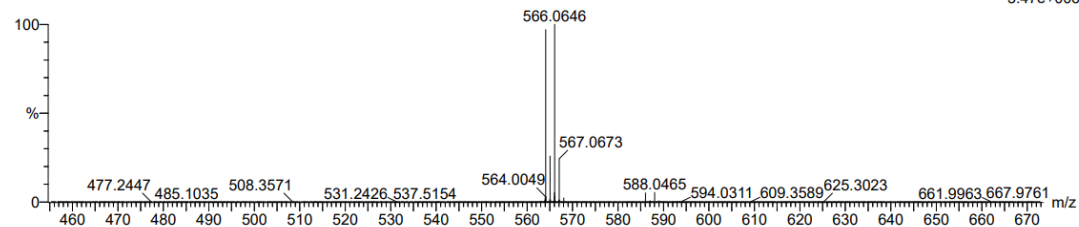Minimum: -1.5  
Maximum: 5.0 3.0 50.0

| Mass     | Calc. Mass | mDa | PPM | DBE  | i-FIT | Norm | Conf (%) | Formula         |
|----------|------------|-----|-----|------|-------|------|----------|-----------------|
| 564.0662 | 564.0658   | 0.4 | 0.7 | 17.5 | 953.0 | n/a  | n/a      | C28 H23 N 07 Br |

Figure S31. HRMS spectrum of compound 8b.

## Single Mass Analysis

Tolerance = 3.0 PPM / DBE: min = -1.5, max = 50.0

Element prediction: Off

Number of isotope peaks used for i-FIT = 3

Monoisotopic Mass, Even Electron Ions

896 formula(e) evaluated with 1 results within limits (up to 50 best isotopic matches for each mass)

Elements Used:

C: 28-28 H: 23-23 N: 0-7 O: 0-200 Br: 0-8

2

0312-2-1d 282 (1.576)

1: TOF MS ES+  
1.28e+006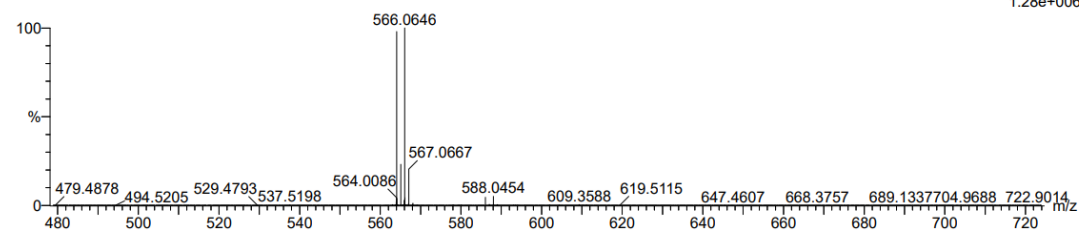Minimum: -1.5  
Maximum: 5.0 3.0 50.0

| Mass     | Calc. Mass | mDa | PPM | DBE  | i-FIT | Norm | Conf (%) | Formula         |
|----------|------------|-----|-----|------|-------|------|----------|-----------------|
| 564.0662 | 564.0658   | 0.4 | 0.7 | 17.5 | 845.0 | n/a  | n/a      | C28 H23 N 07 Br |

Figure S32. HRMS spectrum of compound 8c.

## Single Mass Analysis

Tolerance = 3.0 PPM / DBE: min = -1.5, max = 50.0

Element prediction: Off

Number of isotope peaks used for i-FIT = 3

Monoisotopic Mass, Even Electron Ions

707 formula(e) evaluated with 1 results within limits (up to 50 best isotopic matches for each mass)

Elements Used:

C: 28-28 H: 23-23 N: 0-7 O: 0-200 Cl: 0-3

2

0312-2-1e 244 (1.368)

1: TOF MS ES+  
7.54e+006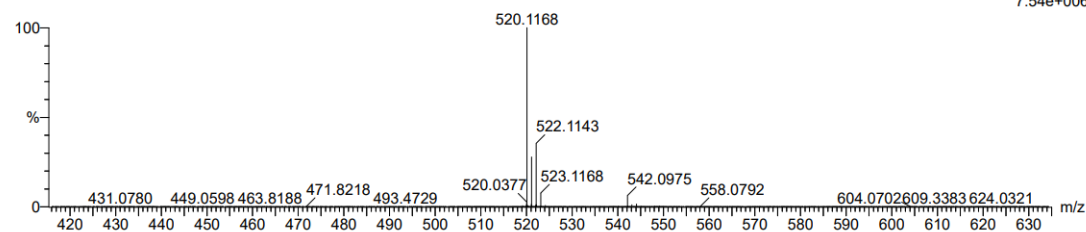Minimum: -1.5  
Maximum: 5.0 3.0 50.0

| Mass     | Calc. Mass | mDa | PPM | DBE  | i-FIT  | Norm | Conf (%) | Formula         |
|----------|------------|-----|-----|------|--------|------|----------|-----------------|
| 520.1168 | 520.1163   | 0.5 | 1.0 | 17.5 | 1034.2 | n/a  | n/a      | C28 H23 N 07 Cl |

Figure S33. HRMS spectrum of compound **8d**.

## Single Mass Analysis

Tolerance = 3.0 PPM / DBE: min = -1.5, max = 50.0

Element prediction: Off

Number of isotope peaks used for i-FIT = 3

Monoisotopic Mass, Even Electron Ions

707 formula(e) evaluated with 1 results within limits (up to 50 best isotopic matches for each mass)

Elements Used:

C: 28-28 H: 23-23 N: 0-7 O: 0-200 Cl: 0-3

2

0312-2-1f 248 (1.389)

1: TOF MS ES+  
5.90e+006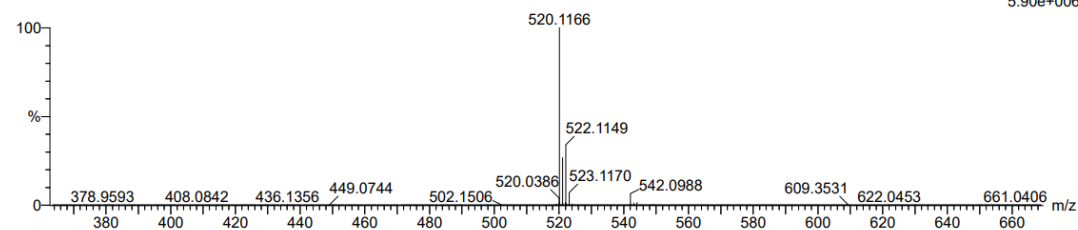Minimum: -1.5  
Maximum: 5.0 3.0 50.0

| Mass     | Calc. Mass | mDa | PPM | DBE  | i-FIT  | Norm | Conf (%) | Formula         |
|----------|------------|-----|-----|------|--------|------|----------|-----------------|
| 520.1166 | 520.1163   | 0.3 | 0.6 | 17.5 | 1034.5 | n/a  | n/a      | C28 H23 N 07 Cl |

Figure S34. HRMS spectrum of compound **8e**.

## Single Mass Analysis

Tolerance = 3.0 PPM / DBE: min = -1.5, max = 50.0

Element prediction: Off

Number of isotope peaks used for i-FIT = 3

Monoisotopic Mass, Even Electron Ions

185 formula(e) evaluated with 1 results within limits (up to 50 best isotopic matches for each mass)

Elements Used:

C: 29-29 H: 26-26 N: 0-7 O: 0-200

2

0312-2-1g 232 (1.297)

1: TOF MS ES+  
8.18e+006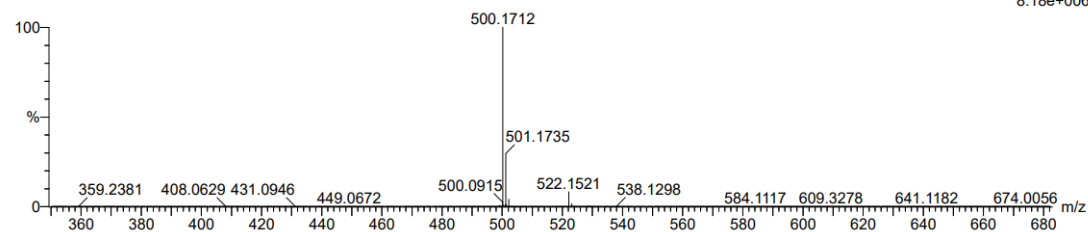Minimum: -1.5  
Maximum: 5.0 3.0 50.0

| Mass     | Calc. Mass | mDa | PPM | DBE  | i-FIT  | Norm | Conf (%) | Formula      |
|----------|------------|-----|-----|------|--------|------|----------|--------------|
| 500.1712 | 500.1709   | 0.3 | 0.6 | 17.5 | 1044.0 | n/a  | n/a      | C29 H26 N 07 |

Figure S35. HRMS spectrum of compound 8f.

## Single Mass Analysis

Tolerance = 3.0 PPM / DBE: min = -1.5, max = 50.0

Element prediction: Off

Number of isotope peaks used for i-FIT = 3

Monoisotopic Mass, Even Electron Ions

213 formula(e) evaluated with 1 results within limits (up to 50 best isotopic matches for each mass)

Elements Used:

C: 29-29 H: 26-26 N: 0-8 O: 0-200

2

0312-2-1h 235 (1.313)

1: TOF MS ES+  
3.57e+006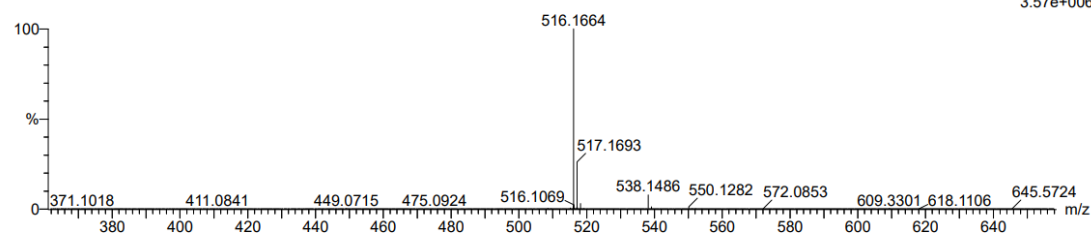Minimum: -1.5  
Maximum: 5.0 3.0 50.0

| Mass     | Calc. Mass | mDa | PPM | DBE  | i-FIT | Norm | Conf (%) | Formula      |
|----------|------------|-----|-----|------|-------|------|----------|--------------|
| 516.1664 | 516.1658   | 0.6 | 1.2 | 17.5 | 949.4 | n/a  | n/a      | C29 H26 N 08 |

Figure S36. HRMS spectrum of compound 8g.

## Single Mass Analysis

Tolerance = 10.0 PPM / DBE: min = -1.5, max = 50.0

Element prediction: Off

Number of isotope peaks used for i-FIT = 3

Monoisotopic Mass, Even Electron Ions

21 formula(e) evaluated with 1 results within limits (up to 50 best isotopic matches for each mass)

Elements Used:

C: 28-28 H: 24-24 N: 0-5 O: 0-8

M

0138-3-135-1-2b 291 (1.623)

1: TOF MS ES+  
8.62e+005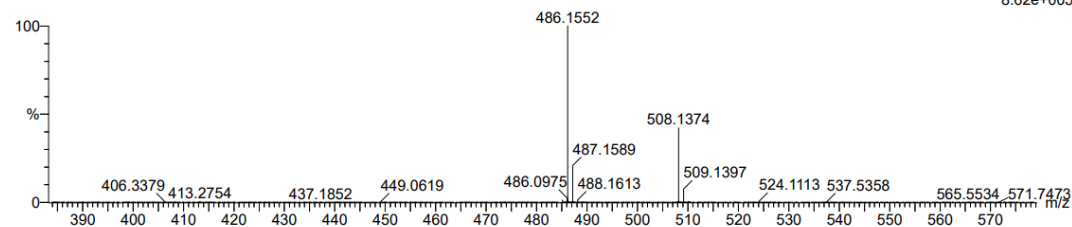Minimum: -1.5  
Maximum: 5.0 10.0 50.0

| Mass     | Calc. Mass | mDa  | PPM  | DBE  | i-FIT | Norm | Conf (%) | Formula      |
|----------|------------|------|------|------|-------|------|----------|--------------|
| 486.1552 | 486.1553   | -0.1 | -0.2 | 17.5 | 719.9 | n/a  | n/a      | C28 H24 N 07 |

Figure S37. HRMS spectrum of compound 9a.

## Single Mass Analysis

Tolerance = 10.0 PPM / DBE: min = -1.5, max = 50.0

Element prediction: Off

Number of isotope peaks used for i-FIT = 3

Monoisotopic Mass, Even Electron Ions

154 formula(e) evaluated with 1 results within limits (up to 50 best isotopic matches for each mass)

Elements Used:

C: 28-28 H: 23-23 N: 0-5 O: 0-8 Br: 0-3

M

0138-3-135-1-2c 312 (1.741)

1: TOF MS ES+  
1.01e+005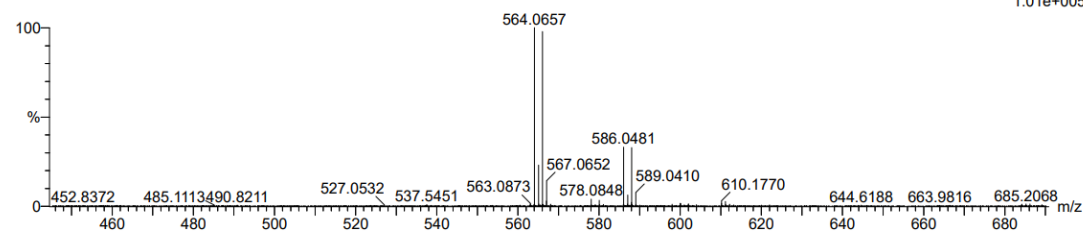Minimum: -1.5  
Maximum: 5.0 10.0 50.0

| Mass     | Calc. Mass | mDa  | PPM  | DBE  | i-FIT | Norm | Conf (%) | Formula         |
|----------|------------|------|------|------|-------|------|----------|-----------------|
| 564.0657 | 564.0658   | -0.1 | -0.2 | 17.5 | 596.1 | n/a  | n/a      | C28 H23 N 07 Br |

. Figure S38. HRMS spectrum of compound 9b.

## Single Mass Analysis

Tolerance = 10.0 PPM / DBE: min = -1.5, max = 50.0

Element prediction: Off

Number of isotope peaks used for i-FIT = 3

Monoisotopic Mass, Even Electron Ions

154 formula(e) evaluated with 1 results within limits (up to 50 best isotopic matches for each mass)

Elements Used:

C: 28-28 H: 23-23 N: 0-5 O: 0-8 Br: 0-3

C

0138-3-135-1-2d 330 (1.835)

1: TOF MS ES+  
8.68e+003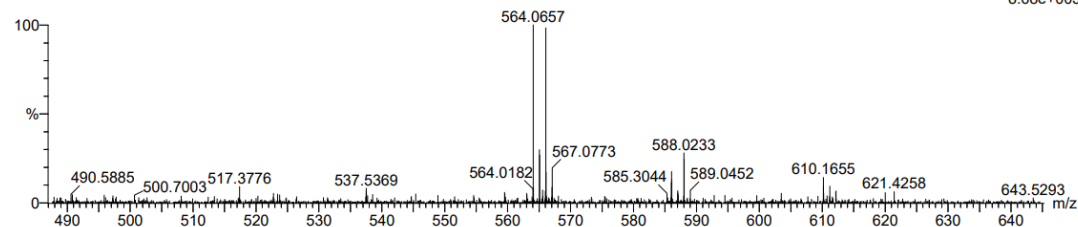Minimum: -1.5  
Maximum: 5.0 10.0 50.0

| Mass     | Calc. Mass | mDa  | PPM  | DBE  | i-FIT | Norm | Conf (%) | Formula         |
|----------|------------|------|------|------|-------|------|----------|-----------------|
| 564.0657 | 564.0658   | -0.1 | -0.2 | 17.5 | 435.9 | n/a  | n/a      | C28 H23 N 07 Br |

Figure S39. HRMS spectrum of compound 9c.

## Single Mass Analysis

Tolerance = 10.0 PPM / DBE: min = -1.5, max = 50.0

Element prediction: Off

Number of isotope peaks used for i-FIT = 3

Monoisotopic Mass, Even Electron Ions

50 formula(e) evaluated with 1 results within limits (up to 50 best isotopic matches for each mass)

Elements Used:

C: 28-28 H: 23-23 N: 0-5 O: 0-8 Cl: 0-1

C

0138-3-135-1-2e 308 (1.720)

1: TOF MS ES+  
5.85e+005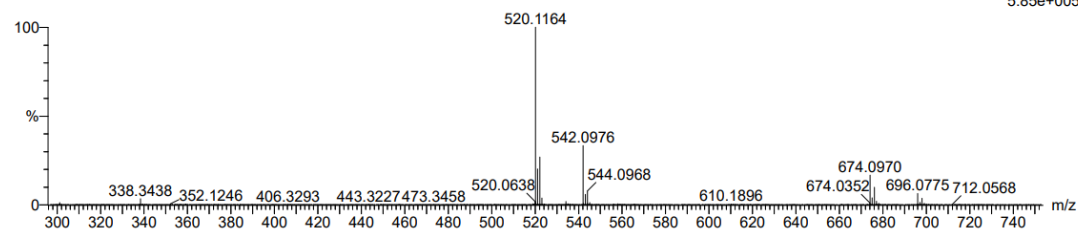Minimum: -1.5  
Maximum: 5.0 10.0 50.0

| Mass     | Calc. Mass | mDa | PPM | DBE  | i-FIT | Norm | Conf (%) | Formula         |
|----------|------------|-----|-----|------|-------|------|----------|-----------------|
| 520.1164 | 520.1163   | 0.1 | 0.2 | 17.5 | 611.8 | n/a  | n/a      | C28 H23 N 07 Cl |

Figure S40. HRMS spectrum of compound 9d.

## Single Mass Analysis

Tolerance = 10.0 PPM / DBE: min = -1.5, max = 50.0

Element prediction: Off

Number of isotope peaks used for i-FIT = 3

Monoisotopic Mass, Even Electron Ions

50 formula(e) evaluated with 1 results within limits (up to 50 best isotopic matches for each mass)

Elements Used:

C: 28-28 H: 23-23 N: 0-5 O: 0-8 Cl: 0-1

C

0138-3-135-1-2f 317 (1.767)

1: TOF MS ES+  
1.84e+005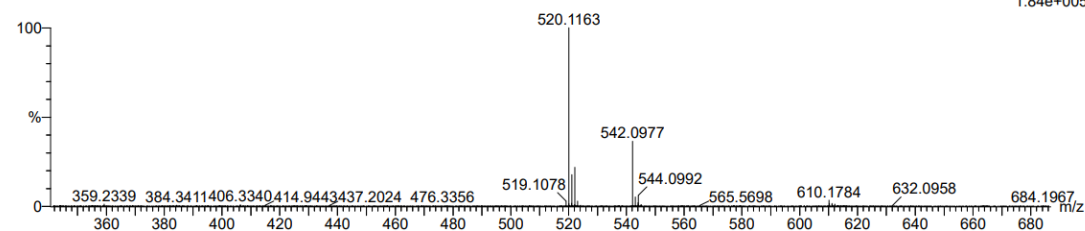Minimum: -1.5  
Maximum: 5.0 10.0 50.0

| Mass     | Calc. Mass | mDa | PPM | DBE  | i-FIT | Norm | Conf(%) | Formula         |
|----------|------------|-----|-----|------|-------|------|---------|-----------------|
| 520.1163 | 520.1163   | 0.0 | 0.0 | 17.5 | 598.6 | n/a  | n/a     | C28 H23 N 07 Cl |

Figure S41. HRMS spectrum of compound 9e.

## Single Mass Analysis

Tolerance = 10.0 PPM / DBE: min = -1.5, max = 50.0

Element prediction: Off

Number of isotope peaks used for i-FIT = 3

Monoisotopic Mass, Even Electron Ions

23 formula(e) evaluated with 1 results within limits (up to 50 best isotopic matches for each mass)

Elements Used:

C: 29-29 H: 26-26 N: 0-5 O: 0-8

C

0138-3-135-1-2h 303 (1.694)

1: TOF MS ES+  
4.40e+005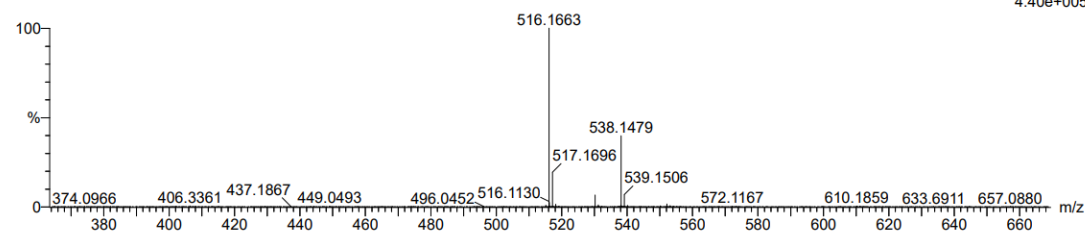Minimum: -1.5  
Maximum: 5.0 10.0 50.0

| Mass     | Calc. Mass | mDa | PPM | DBE  | i-FIT | Norm | Conf(%) | Formula      |
|----------|------------|-----|-----|------|-------|------|---------|--------------|
| 516.1663 | 516.1658   | 0.5 | 1.0 | 17.5 | 630.1 | n/a  | n/a     | C29 H26 N 08 |

Figure S42. HRMS spectrum of compound 9f.
